# Supplementary material for: Increased risk of death in covid-19 hospital admissions during the second wave as compared to the first epidemic wave. A prospective dynamic cohort study in South London, UK
Source: bioRxiv or medRxiv preprint supplement (doi:10.1101/2021.06.09.21258537), 2021-06-12
Supplement: Supplementary file [file media-1.pdf]

1 Supplemental Table 1: Mortality rates, and crude Incidence Rate Ratios (IRRc) for all variables of interest.

2

| Variable / Categories                     | Total N=2,685<br>(100.0%) | Dead N=752<br>(28.0%) | Person-<br>days $\phi$ | Rate <sup>†</sup> | IRRc      | IRRc 95%CI   | p-value |
|-------------------------------------------|---------------------------|-----------------------|------------------------|-------------------|-----------|--------------|---------|
| <b>Wave</b>                               |                           |                       |                        |                   |           |              |         |
| First                                     | 884 (100.0%)              | 297 (33.6%)           | 133.450                | 2.23              | Intercept |              |         |
| Second                                    | 1,801 (100.0%)            | 455 (25.3%)           | 274.324                | 1.66              | 0.75      | (0.64, 0.86) | < 0.001 |
| <b>Sex at birth</b>                       |                           |                       |                        |                   |           |              |         |
| Female                                    | 1,139 (100.0%)            | 274 (24.1%)           | 165.514                | 1.66              | Intercept |              |         |
| Male                                      | 1,546 (100.0%)            | 478 (30.9%)           | 242.260                | 1.97              | 1.19      | (1.03, 1.38) | < 0.001 |
| <b>Age grouped (years)<sup>1</sup></b>    |                           |                       |                        |                   |           |              |         |
| [18,40)                                   | 217 (100.0%)              | 21 (9.7%)             | 21.905                 | 0.96              | Intercept |              |         |
| [40,60)                                   | 678 (100.0%)              | 91 (13.4%)            | 92.474                 | 0.98              | 1.03      | (0.65, 1.69) |         |
| [60,80)                                   | 1,067 (100.0%)            | 326 (30.6%)           | 176.710                | 1.84              | 1.92      | (1.27, 3.09) |         |
| ≥80                                       | 723 (100.0%)              | 314 (43.4%)           | 116.685                | 2.69              | 2.81      | (1.85, 4.50) | < 0.001 |
| <b>Ethnicity</b>                          |                           |                       |                        |                   |           |              |         |
| White                                     | 928 (100.0%)              | 270 (29.1%)           | 155.554                | 1.74              | Intercept |              |         |
| Asian                                     | 491 (100.0%)              | 157 (32.0%)           | 66.030                 | 2.38              | 1.37      | (1.12, 1.67) |         |
| Black                                     | 392 (100.0%)              | 114 (29.1%)           | 60.200                 | 1.89              | 1.09      | (0.87, 1.35) |         |
| Other                                     | 634 (100.0%)              | 144 (22.7%)           | 89.640                 | 1.61              | 0.93      | (0.75, 1.13) |         |
| Unknown                                   | 240 (100.0%)              | 67 (27.9%)            | 36.350                 | 1.84              | 1.06      | (0.81, 1.38) | 0.009   |
| <b>CFS</b>                                |                           |                       |                        |                   |           |              |         |
| 1: Very fit                               | 195 (100.0%)              | 23 (11.8%)            | 21.870                 | 1.05              | Intercept |              |         |
| 2: Fit                                    | 290 (100.0%)              | 63 (21.7%)            | 41.995                 | 1.50              | 1.43      | (0.90, 2.35) |         |
| 3: Managing well                          | 898 (100.0%)              | 165 (18.4%)           | 124.380                | 1.33              | 1.26      | (0.83, 2.00) |         |
| 4: Vulnerable                             | 323 (100.0%)              | 94 (29.1%)            | 56.970                 | 1.65              | 1.57      | (1.01, 2.53) |         |
| 5: Mildly frail                           | 263 (100.0%)              | 90 (34.2%)            | 42.715                 | 2.11              | 2.00      | (1.29, 3.24) |         |
| 6: Moderately frail                       | 354 (100.0%)              | 138 (39.0%)           | 64.909                 | 2.13              | 2.02      | (1.33, 3.22) |         |
| 7-9: Severely frail                       | 360 (100.0%)              | 177 (49.2%)           | 54.925                 | 3.22              | 3.06      | (2.03, 4.86) | < 0.001 |
| Missing                                   | 2                         | 2                     |                        |                   |           |              |         |
| <b>CCI</b>                                |                           |                       |                        |                   |           |              |         |
| 0                                         | 295 (100.0%)              | 16 (5.4%)             | 28.764                 | 0.56              | Intercept |              |         |
| 1                                         | 288 (100.0%)              | 35 (12.2%)            | 35.740                 | 0.98              | 1.76      | (0.99, 3.27) |         |
| 2                                         | 334 (100.0%)              | 71 (21.3%)            | 51.475                 | 1.38              | 2.48      | (1.48, 4.42) |         |
| 3                                         | 347 (100.0%)              | 79 (22.8%)            | 57.320                 | 1.38              | 2.48      | (1.49, 4.40) |         |
| 4                                         | 369 (100.0%)              | 103 (27.9%)           | 59.500                 | 1.73              | 3.11      | (1.89, 5.47) |         |
| 5                                         | 348 (100.0%)              | 112 (32.2%)           | 58.000                 | 1.93              | 3.47      | (2.12, 6.09) |         |
| 6                                         | 297 (100.0%)              | 139 (46.8%)           | 49.680                 | 2.80              | 5.03      | (3.10, 8.78) |         |
| 7                                         | 188 (100.0%)              | 88 (46.8%)            | 30.255                 | 2.91              | 5.23      | (3.16, 9.24) |         |
| 8_over                                    | 219 (100.0%)              | 109 (49.8%)           | 37.040                 | 2.94              | 5.29      | (3.23, 9.29) | < 0.001 |
| <b>BMI<sup>1</sup> (kg/m<sup>2</sup>)</b> |                           |                       |                        |                   |           |              |         |
| <18.5                                     | 128 (100.0%)              | 44 (34.4%)            | 23.980                 | 1.83              | Intercept |              |         |
| [18.5,25)                                 | 784 (100.0%)              | 225 (28.7%)           | 134.840                | 1.67              | 0.91      | (0.67, 1.27) |         |
| [25,30)                                   | 784 (100.0%)              | 197 (25.1%)           | 128.134                | 1.54              | 0.84      | (0.61, 1.18) |         |
| ≥30                                       | 725 (100.0%)              | 152 (21.0%)           | 107.140                | 1.42              | 0.77      | (0.56, 1.09) | < 0.001 |

|                                |                |             |         |      |           |                |         |  |
|--------------------------------|----------------|-------------|---------|------|-----------|----------------|---------|--|
| Missing                        | 264            | 134         |         |      |           |                |         |  |
| <b>Social history</b>          |                |             |         |      |           |                |         |  |
| Independent                    | 1,566 (100.0%) | 315 (20.1%) | 217.410 | 1.45 | Intercept |                |         |  |
| Family Assistance              | 503 (100.0%)   | 209 (41.6%) | 85.160  | 2.45 | 1.69      | (1.42, 2.02)   |         |  |
| Formal Assistance              | 357 (100.0%)   | 131 (36.7%) | 69.459  | 1.89 | 1.30      | (1.06, 1.59)   |         |  |
| Care Home                      | 235 (100.0%)   | 94 (40.0%)  | 30.435  | 3.09 | 2.13      | (1.68, 2.67)   | < 0.001 |  |
| Missing                        | 24             | 3           |         |      |           |                |         |  |
| <b>Symptomatic<sup>2</sup></b> |                |             |         |      |           |                |         |  |
| No                             | 408 (100.0%)   | 85 (20.8%)  | 92.110  | 0.92 | Intercept |                |         |  |
| Yes                            | 2,277 (100.0%) | 667 (29.3%) | 315.664 | 2.11 | 2.29      | (1.84, 2.89)   | < 0.001 |  |
| <b>ICU admission</b>           |                |             |         |      |           |                |         |  |
| No                             | 2,073 (100.0%) | 451 (21.8%) | 280.554 | 1.61 | Intercept |                |         |  |
| Yes                            | 612 (100.0%)   | 301 (49.2%) | 127.220 | 2.37 | 1.47      | (1.27, 1.70)   |         |  |
| <b>Oxygen requirement</b>      |                |             |         |      |           |                |         |  |
| No                             | 683 (100.0%)   | 11 (1.6%)   | 104.434 | 0.11 | Intercept |                |         |  |
| Yes                            | 1,982 (100.0%) | 733 (37.0%) | 302.070 | 2.43 | 23.04     | (13.38, 44.53) | < 0.001 |  |
| Missing                        | 20             | 8           |         |      |           |                |         |  |
| <b>HFNO/CPAP</b>               |                |             |         |      |           |                |         |  |
| No                             | 2,185 (100.0%) | 520 (23.8%) | 308.964 | 1.68 | Intercept |                |         |  |
| Yes                            | 473 (100.0%)   | 222 (46.9%) | 92.890  | 2.39 | 1.42      | (1.21, 1.66)   | < 0.001 |  |
| Missing                        | 27             | 10          |         |      |           |                |         |  |
| <b>Invasive ventilation</b>    |                |             |         |      |           |                |         |  |
| No                             | 2,264 (100.0%) | 500 (22.1%) | 307.749 | 1.62 | Intercept |                |         |  |
| Yes                            | 405 (100.0%)   | 248 (61.2%) | 97.145  | 2.55 | 1.57      | (1.35, 1.83)   | < 0.001 |  |
| Missing                        | 16             | 4           |         |      |           |                |         |  |
| <b>Dexamethasone</b>           |                |             |         |      |           |                |         |  |
| No                             | 1,399 (100.0%) | 376 (26.9%) | 215.994 | 1.74 | Intercept |                |         |  |
| Yes                            | 1,286 (100.0%) | 376 (29.2%) | 191.780 | 1.96 | 1.13      | (0.98, 1.30)   | 0.173   |  |
| <b>Tocilizumab</b>             |                |             |         |      |           |                |         |  |
| No                             | 2,438 (100.0%) | 665 (27.3%) | 362.224 | 1.84 | Intercept |                |         |  |
| Yes                            | 247 (100.0%)   | 87 (35.2%)  | 45.550  | 1.91 | 1.04      | (0.83, 1.29)   | 0.008   |  |
| <b>Remdesivir</b>              |                |             |         |      |           |                |         |  |
| No                             | 2,116 (100.0%) | 609 (28.8%) | 317.149 | 1.92 | Intercept |                |         |  |
| Yes                            | 569 (100.0%)   | 143 (25.1%) | 90.625  | 1.58 | 0.82      | (0.68, 0.98)   | 0.085   |  |

3 (φ) person-days per 100 (¶) mortality rate per 100 person-days

4 (1) Brackets indicate that the side of the interval is closed; parenthesis, that the number is excluded. (2) Symptomatic at admission

5 CFS: Clinical Frailty Score, CCI: Charlson Comorbidity Index, ICU: Intensive Care Unit, HFNO/CPAP: High Flow Nasal Oxygen/Continuous

6 Positive Airway Pressure

7

8 Supplemental Table 2: Crude and adjusted IRR for the effect of wave on mortality among ICU admissions

| Covariate                        | N   | Missing | IRRc | IRRa 95%CI   | IRRa | IRRa 95%CI   |
|----------------------------------|-----|---------|------|--------------|------|--------------|
| Dexamethasone                    | 612 | 0       | 0.98 | (0.77, 1.24) | 2.19 | (1.30, 3.68) |
| Remdesivir                       | 612 | 0       | 0.98 | (0.77, 1.24) | 1.15 | (0.88, 1.50) |
| Age grouped (years)              | 612 | 0       | 0.98 | (0.77, 1.24) | 0.82 | (0.65, 1.05) |
| Charlson Comorbidity Index (CCI) | 612 | 0       | 0.98 | (0.77, 1.24) | 0.84 | (0.66, 1.08) |
| Tocilizumab                      | 612 | 0       | 0.98 | (0.77, 1.24) | 1.07 | (0.84, 1.38) |
| Clinical frailty score (CFS)     | 612 | 0       | 0.98 | (0.77, 1.24) | 0.89 | (0.70, 1.14) |
| HFNO/CPAP                        | 604 | 8       | 0.96 | (0.76, 1.21) | 1.03 | (0.80, 1.34) |
| Invasive ventilation             | 612 | 0       | 0.98 | (0.77, 1.24) | 1.03 | (0.81, 1.31) |
| Social history                   | 604 | 8       | 0.97 | (0.77, 1.23) | 0.95 | (0.75, 1.20) |
| Ethnicity                        | 612 | 0       | 0.98 | (0.77, 1.24) | 0.97 | (0.76, 1.25) |
| BMI grouped (kg/m <sup>2</sup> ) | 563 | 49      | 1.14 | (0.88, 1.50) | 1.14 | (0.88, 1.49) |
| Symptomatic at admission         | 612 | 0       | 0.98 | (0.77, 1.24) | 0.98 | (0.78, 1.24) |
| Sex                              | 612 | 0       | 0.98 | (0.77, 1.24) | 0.98 | (0.78, 1.24) |

9 IRRc: crude RR. IRRa: adjusted RR. Covariates above the dotted line are those change in the magnitude of the effect was  $\geq 5.5\%$

10 ICU: Intensive Care Unit, HFNO/CPAP: High Flow Nasal Oxygen/Continuous Positive Airway Pressure

11

12 Supplemental Table 3: Multivariable causal models for the effect of wave on in-hospital mortality

| #  | MODEL                       | N     | Failures | Df | RMSE  | SE( $\beta$ ) | HR   | HR 95%CI     |
|----|-----------------------------|-------|----------|----|-------|---------------|------|--------------|
| m1 | wave                        | 2,685 | 752      | 1  | --    | 0.075         | 0.75 | (0.65, 0.87) |
| m2 | wave + (A1, A2)             | 2,685 | 752      | 5  | --    | 0.075         | 0.76 | (0.65, 0.88) |
| m3 | wave + (A1, A2) + (V1 - V6) | 2,646 | 738      | 18 | 0.131 | 0.131         | 1.65 | (1.28, 2.24) |
| m4 | wave + (A1, A2) + (V1 - V4) | 2,665 | 744      | 16 | 0.129 | 0.128         | 1.62 | (1.26, 2.08) |
| i1 | wave                        | 612   | 301      | 1  | --    | 0.120         | 0.95 | (0.75, 1.20) |
| i2 | wave + (A1, A2)             | 612   | 301      | 5  | --    | 0.124         | 0.80 | (0.62, 1.01) |
| i3 | wave + (A1, A2) + (C1 -C6)  | 604   | 298      | 23 | 0.323 | 0.323         | 1.93 | (1.02, 3.63) |
| i4 | wave + (A1, A2) + (C1 -C4)  | 604   | 298      | 9  | 0.306 | 0.304         | 2.00 | (1.10, 3.62) |

13 m: model in overall population, i: model in ICU admission only (sub-analysis)

14 #1: crude model, #2: adjusted for a priori confounders (forced variables), #3: full model, #4: reduced model

15 (A1) Age fitted as flexible spline, (A2) Gender.

16 (V1): Dexamethasone, (V2): Oxygen requirement, (V3): Symptomatic at admission, (V4): CCI. (V5): ICU admission, (V6): HFNO/CPAP.

17 (C1): Dexamethasone, (C2): Remdesivir, (C3): Tocilizumab, (C4): HFNO/CPAP, (C5): CFS, (C6): CCI.

18 Df: model degrees of freedom, RMSE: Root Mean Square Error, SE( $\beta$ ) SE: of the coefficient (log scale), HR: Hazard Ratio.

19
